# Supplementary material
Source: publisher site journal article supplement (https://www.dovepress.com/article/supplementary_file/543826/543826%20Revised%20Supplementary%20Materials.docx)
Supplement: Supplementary file 1 [file 543826%20Revised%20Supplementary%20Materials.docx]

## Supplementary table

**Table S1** Descriptive analysis of the bariatric surgery patients’ knowledge about nutrition

|  | **Total sample  (n = 237)** | **Early DS  (n = 182)** | **Late DS  (n = 55)** | **Comparison between subgroups** |
| --- | --- | --- | --- | --- |
| **K1: How bariatric surgery affects weight loss?** | | | | |
| (+) Reduces the amounts consumed | 217 (91.6%) | 168 (92.3%) | 49 (89.1%) | p = 0.420F |
| (+) Reduces hunger | 134 (56.5%) | 101 (55.5%) | 33 (60.0%) | p = 0.555C |
| (+) Manipulates GI absorption of nutrients | 58 (24.5%) | 45 (24.7%) | 13 (23.6%) | p = 0.869C |
| (-) Stops snacking behavior and consumption of unhealthy foods | 114 (48.1%) | 84 (46.2%) | 30 (54.5%) | p = 0.275C |
| (-) Limits ability to eat and allows drinking only | 84 (35.4%) | 65 (35.7%) | 19 (34.5%) | p = 0.874C |
| (-) Limits craving for sweet foods | 91 (38.4%) | 63 (34.6%) | 28 (50.9%) | p = 0.029C |
| **K2: What are the progress diet steps following bariatric surgery?** | | | | |
| (-) Start with solid foods right after surgery | 2 (0.8%) | 2 (1.1%) | 0 (0%) | p = 0.288F |
| (-) First several months consumption of liquids only, then gradually progress into food textures | 22 (9.3%) | 15 (8.2%) | 7 (12.7%) |  |
| (+) Progress from liquid foods to mashed foods, to soft, to solid foods within one to two months | 136 (57.4%) | 101 (55.5%) | 35 (63.6%) |  |
| (-) Progress from liquid foods to mashed foods, to soft foods within one to two months | 77 (32.5%) | 64 (35.2%) | 13 (23.6%) |  |
| **K3: Which of the following foods are rich in protein?** | | | | |
| (+) Humus, peas | 100 (42.2%) | 78 (42.9%) | 22 (40.0%) | p = 0.707C |
| (+) Yellow cheese | 36 (15.2%) | 30 (16.5%) | 6 (10.9%) | p = 0.313C |
| (+) Soymilk | 30 (12.7%) | 26 (14.3%) | 4 (7.3%) | p = 0.170C |
| (+) Chicken, turkey | 215 (90.7%) | 166 (91.2%) | 49 (89.1%) | p = 0.635C |
| (+) Milk and yogurt | 142 (59.9%) | 106 (58.2%) | 36 (65.5%) | p = 0.229C |
| (+) Fish | 209 (88.2%) | 159 (87.4%) | 50 (90.9%) | p = 0.475C |
| (-) Cabbage | 10 (4.2%) | 8 (4.4%) | 2 (3.6%) | p = 1.00F |
| (-) Bread | 2 (0.8%) | 2 (1.1%) | 0 (0%) | p = 1.00F |
| (-) Rice | 3 (1.3%) | 3 (1.6%) | 0 (0%) | p = 1.00F |
| (-) Walnuts | 20 (8.4%) | 15 (8.2%) | 5 (9.1%) | p = 0.787F |
| (-) Pasta | 7 (3.0%) | 6 (3.3%) | 1 (1.8%) | p = 1.00F |
| (-) Cucumber | 6 (2.5%) | 5 (2.7%) | 1 (1.8%) | p = 1.00F |
| (-) Avocado | 54 (22.8%) | 42 (23.1%) | 12 (21.8%) | p = 0.845C |
| (-) Cracker | 5 (2.1%) | 5 (2.7%) | 0 (0%) | p = 0.593F |
| (-) Banana | 28 (11.8%) | 21 (11.5%) | 7 (12.7%) | p = 0.811C |
| **K4: Which of the following foods are rich in carbohydrates?** | | | | |
| (+) Crackers | 115 (48.5%) | 91 (50.0%) | 24 (43.6%) | p = 0.408C |
| (+) Pasta | 182 (76.8%) | 138 (75.8%) | 44 (80.0%) | p = 0.520C |
| (+) Potato | 180 (75.9%) | 141 (77.5%) | 39 (70.9%) | p = 0.318C |
| (+) Bread | 194 (81.9%) | 154 (84.6%) | 40 (72.7%) | p = 0.045C |
| (+) Rice | 106 (86.9%) | 156 (85.7%) | 50 (90.9%) | p = 0.317C |
| (+) Sweet Potato | 136 (57.4%) | 106 (58.2%) | 30 (54.5%) | p = 0.627C |
| (-) Walnuts | 19 (8.0%) | 17 (9.3%) | 2 (3.6%) | p = 0.258F |
| (-) Tahini | 39 (16.5%) | 28 (15.4%) | 11 (20.0%) | p = 0.419C |
| (-) Lettuce | 4 (1.7%) | 4 (2.2%) | 0 (0%) | p = 0.576F |
| (-) Avocados | 13 (5.5%) | 13 (7.1%) | 0 (0%) | p = 0.043F |
| (-) Yellow cheese | 25 (10.5%) | 21 (11.5%) | 4 (7.3%) | p = 0.367C |
| (-) Eggs | 11 (4.6%) | 10 (5.5%) | 1 (1.8%) | p = 0.465F |
| (-) Olive Oil | 6 (2.5%) | 6 (3.3%) | 0 (0%) | p = 0.341F |
| (-) Turkey | 4 (1.7%) | 2 (1.6%) | 1 (1.8%) | p = 1.00F |
| (-) Red meats | 12 (5.1%) | 9 (4.9%) | 3 (5.5%) | p = 1.00F |
| **K5: Which of the following dietary supplements you will be required to take following Bariatric surgery?** | | | | |
| (+) Calcium | 112 (47.3%) | 86 (47.3%) | 26 (47.3%) | p = 0.998C |
| (+) Multivitamin | 206 (86.9%) | 160 (87.9%) | 46 (83.6%) | p = 0.410C |
| (+) Vitamin D | 185 (78.1%) | 144 (79.1%) | 41 (74.5%) | p = 0.472C |
| (+) Vitamin B12 | 205 (86.5%) | 159 (87.4%) | 46 (83.6%) | p = 0.479C |
| (-) Phosphorus | 18 (7.6%) | 14 (7.7%) | 4 (7.3%) | p = 1.00F |
| (-) Vitamin K | 25 (10.5%) | 19 (10.4%) | 6 (10.9%) | p = 0.921C |
| (-) Turmeric | 5 (2.1%) | 5 (2.7%) | 0 (0%) | p = 0.593F |
| (-) Vitamin C | 49 (20.7%) | 34 (18.7%) | 15 (27.3%) | p = 0.168C |
| **K6: For how long, after the bariatric surgery, you should take dietary supplements?** | | | | |
| (-) For the first month after surgery | 6 (2.5%) | 5 (2.7%) | 1 (1.8%) | p = 0.712F |
| (+) For a life-time | 33 (13.9%) | 23 (12.6%) | 10 (18.2%) |  |
| (-) Only for the first year after surgery | 36 (15.2%) | 27 (14.8%) | 9 (16.4%) |  |
| (-) Depends on your blood test results | 162 (68.4%) | 127 (69.8%) | 35 (63.6%) |  |
| **K7: From which of the following foods/drinks you should avoid forever after bariatric surgery?** | | | | |
| (+) Persimmons | 5 (2.1%) | 4 (2.2%) | 1 (1.8%) | p = 1.00F |
| (+) Carbonated drinks | 222 (93.7%) | 171 (94.0%) | 51 (92.7%) | p = 0.754F |
| (+) Citrus pulp (inside of the fruit slice) | 26 (11.0%) | 15 (8.2%) | 11 (20.0%) | p = 0.014C |
| (-) Watermelon | 2 (0.8%) | 2 (1.1%) | 0 (0%) | p = 1.00F |
| (-) Red meats | 6 (2.5%) | 6 (3.3%) | 0 (0%) | p = 0.341F |
| (-) Pears | 7 (3.0%) | 6 (3.3%) | 1 (1.8%) | p = 1.00F |
| (-) Bread | 30 (12.7%) | 24 (13.2%) | 6 (10.9%) | p = 0.656C |
| (-) Pasta | 18 (7.6%) | 16 (8.8%) | 2 (3.6%) | p = 0.258F |
| (-) Chocolates | 97 (40.9%) | 74 (40.7%) | 23 (41.8%) | p = 0.878C |
| **K8: Which of the following diet behaviors are recommended following bariatric surgery?** | | | | |
| (+) Eating protein-rich foods | 158 (66.7%) | 117 (64.3%) | 41 (74.5%) | p = 0.157C |
| (+) Avoid carbonated drinks | 195 (82.3%) | 150 (82.4%) | 45 (81.8%) | p = 0.919C |
| (+) Eating regular meals every 3-4 hours | 181 (76.4%) | 137 (75.3%) | 44 (80.0%) | p = 0.470C |
| (+) Separating fluids from solid foods when eat | 192 (81.0%) | 150 (82.4%) | 42 (76.4%) | p = 0.316C |
| (+) Chew foods well | 200 (84.4%) | 153 (84.1%) | 47 (85.5%) | p = 0.804C |
| (-) Eating and drinking together | 47 (19.8%) | 41 (22.5%) | 6 (10.9%) | p = 0.058C |
| (-) Eating 1-2 meals per day | 22 (9.3%) | 20 (11.0%) | 2 (3.6%) | p = 0.100C |
| (-) Eating fast | 51 (21.5%) | 43 (23.6%) | 8 (14.5%) | p = 0.151C |
| (-) Consumption of fatty foods | 33 (13.9%) | 28 (15.4%) | 5 (9.1%) | p = 0.237C |
| **K9: How many cups/day of drinks are recommended following bariatric surgery?** | | | | |
| (-) 8-10 cups/day, no matter which drinks | 34 (14.3%) | 25 (13.7%) | 9 (16.4%) | p = 0.671F |
| (-) 1-2 cups per day, preferably drinking water | 9 (3.8%) | 6 (3.3%) | 3 (5.5%) |  |
| (-) 4-5 cups/day, preferably drinking water | 24 (10.1%) | 20 (11.0%) | 4 (7.3%) |  |
| (+) 8-10 cups per day, preferably drinking water | 170 (71.7%) | 131 (72.0%) | 39 (70.9%) |  |
| **K10: How many dietitian sessions are recommending following bariatric surgery?** | | | | |
| (-) Total of 2 sessions, frequency isn't important | 42 (17.7%) | 32 (17.6%) | 10 (18.2%) | p = 0.895C |
| (+) At least 6 sessions during the first year, and then at least 1-3 sessions per year | 125 (52.7%) | 97 (53.3%) | 28 (50.9%) |  |
| (-) Dietitian sessions after surgery are meaningless | 36 (15.2%) | 26 (14.3%) | 10 (18.2%) |  |
| (-) Once per year | 34 (14.3%) | 27 (14.8%) | 7 (12.7%) |  |
| **K11: What are the reasons that can cause weight regain after bariatric surgery?** | | | | |
| (+) Eating and drinking together may expand the stomach volume | 171 (72.2%) | 129 (70.9%) | 42 (76.4%) | p = 0.427C |
| (+) Eating till feeling pain | 145 (61.2%) | 116 (63.7%) | 29 (52.7%) | p = 0.142C |
| (+) Following non-recommended eating behaviors | 212 (89.5%) | 164 (90.1%) | 48 (87.3%) | p = 0.548C |
| (-) After a year, surgery is not effective anymore | 17 (7.2%) | 14 (7.7%) | 3 (5.5%) | p = 0.769F |
| (-) There is no possibility for weight gain after bariatric surgery | 12 (5.1%) | 9 (4.9%) | 3 (5.5%) | p = 1.00F |
| (-) Eating bread will expand the stomach volume | 55 (23.2%) | 43 (23.6%) | 12 (21.8%) | p = 0.781C |
| Nutritional Knowledge overall score (0-100 range) | 60.88 ± 14.76  [11 – 92] | 60.85 ± 14.36  [15 – 92] | 60.98 ± 16.14  [11 – 90] | p = 0.953T |

Reported values are frequency (%) or Mean ± SD [range]; (+) correct answer; (-) incorrect answer; Cchi-square test; FFisher’s Exact test; Tindependent samples t-test.

**Table S2** Descriptive analysis of the bariatric surgery patients’ knowledge about nutrition

| **Knowledge question points** | **Total sample  (n = 237)** | **Early DS  (n = 182)** | **Late DS  (n = 55)** | **Comparison between subgroups** |
| --- | --- | --- | --- | --- |
| **K1: How bariatric surgery affects weight loss?** | | | | |
| 0  1  2  3 | 12 (5.1%)  81 (34.2%)  104 (43.9%)  40 (16.9%) | 8 (4.4%)  64 (35.2%)  80 (44.0%)  30 (16.5%) | 4 (7.3%)  17 (30.9%)  24 (43.6%)  10 (18.2%) | p = 0.770F |
| **K2: What are the progress diet steps following bariatric surgery?** | | | | |
| 0  4 | 101 (42.6%)  136 (57.4%) | 81 (44.5%)  101 (55.5%) | 20 (36.4%)  35 (63.6%) | p = 0.285C |
| **K3: Which of the following foods are rich in protein?** | | | | |
| 0  1  2  3  4  5  6 | 4 (1.7%)  16 (6.8%)  53 (22.4%)  75 (31.6%)  66 (27.8%)  17 (7.2%)  6 (2.5%) | 3 (1.6%)  10 (5.5%)  43 (23.6%)  58 (31.9%)  51 (28.0%)  11 (6.0%)  6 (3.3%) | 1 (1.8%)  6 (10.9%)  10 (18.2%)  17 (30.9%)  15 (27.3%)  6 (10.9%)  0 (0%) | p = 0.462F |
| **K4: Which of the following foods are rich in carbohydrates?** | | | | |
| 0  1  2  3  4  5  6 | 8 (3.4%)  17 (7.2%)  19 (8.0%)  23 (9.7%)  41 (17.3%)  49 (20.7%)  80 (33.8%) | 6 (3.3%)  12 (6.6%)  15 (8.2%)  16 (8.8%)  33 (18.1%)  36 (19.8%)  64 (35.2%) | 2 (3.6%)  5 (9.1%)  4 (7.3%)  7 (12.7%)  8 (14.5%)  13 (23.6%)  16 (29.1%) | p = 0.876F |
| **K5: Which of the following dietary supplements you will be required to take following Bariatric surgery?** | | | | |
| 0  1  2  3  4 | 4 (1.7%)  28 (11.8%)  31 (13.1%)  78 (32.9%)  96 (40.5%) | 3 (1.6%)  21 (11.5%)  22 (12.1%)  60 (33.0%)  76 (41.8%) | 1 (1.8%)  7 (12.7%)  9 (16.4%)  18 (32.7%)  20 (36.4%) | p = 0.870F |
| **K6: For how long, after the bariatric surgery, you should take dietary supplements?** | | | | |
| 0  6 | 204 (86.1%)  33 (13.9%) | 159 (87.4%)  23 (12.6%) | 45 (81.8%)  10 (18.2%) | p = 0.298C |
| **K7: From which of the following foods/drinks you should avoid forever after bariatric surgery?** | | | | |
| 0  1  2  3 | 8 (3.4%)  206 (86.9%)  22 (9.3%)  1 (0.4%) | 7 (3.8%)  161 (88.5%)  13 (7.1%)  1 (0.5%) | 1 (1.8%)  45 (81.8%)  9 (16.4%)  0 (0%) | p = 0.174F |
| **K8: Which of the following diet behaviors are recommended following bariatric surgery?** | | | | |
| 0  1  2  3  4  5 | 6 (2.5%)  16 (6.8%)  19 (8.0%)  26 (11.0%)  56 (23.6%)  114 (48.1%) | 4 (2.2%)  13 (7.1%)  16 (8.8%)  21 (11.5%)  41 (22.5%)  87 (47.8%) | 2 (3.6%)  3 (5.5%)  3 (5.5%)  5 (9.1%)  15 (27.3%)  27 (49.1%) | p = 0.894F |
| **K9: How many cups/day of drinks are recommended following bariatric surgery?** | | | | |
| 0  6 | 67 (28.3%)  170 (71.7%) | 51 (28.0%)  131 (72.0%) | 16 (29.1%)  39 (70.9%) | p = 0.877C |
| **10: How many dietitian sessions are recommending following bariatric surgery?** | | | | |
| 0  6 | 112 (47.3%)  125 (52.7%) | 85 (46.7%)  97 (53.3%) | 27 (49.1%)  28 (50.9%) | p = 0.756C |
| **K11: What are the reasons that can cause weight regain after bariatric surgery?** | | | | |
| 0  1  2  3 | 3 (1.3%)  51 (21.5%)  72 (30.4%)  111 (46.8%) | 0 (0%)  42 (23.1%)  53 (29.1%)  87 (47.8%) | 3 (5.5%)  9 (16.4%)  19 (34.5%)  24 (43.6%) | **p = 0.024F** |

Reported values are frequency (%); Cchi-square test; FFisher’s Exact test.
